# Supplementary material for: At Early Rheumatoid Arthritis Stage, the Infectious Spectrum Is Driven by Non-Familial Factors and Anti-CCP Immunization
Source: MDPI journal article supplement (doi:10.3390/jcm13102796), 2024-05-09
Supplement: s1 [file s1]

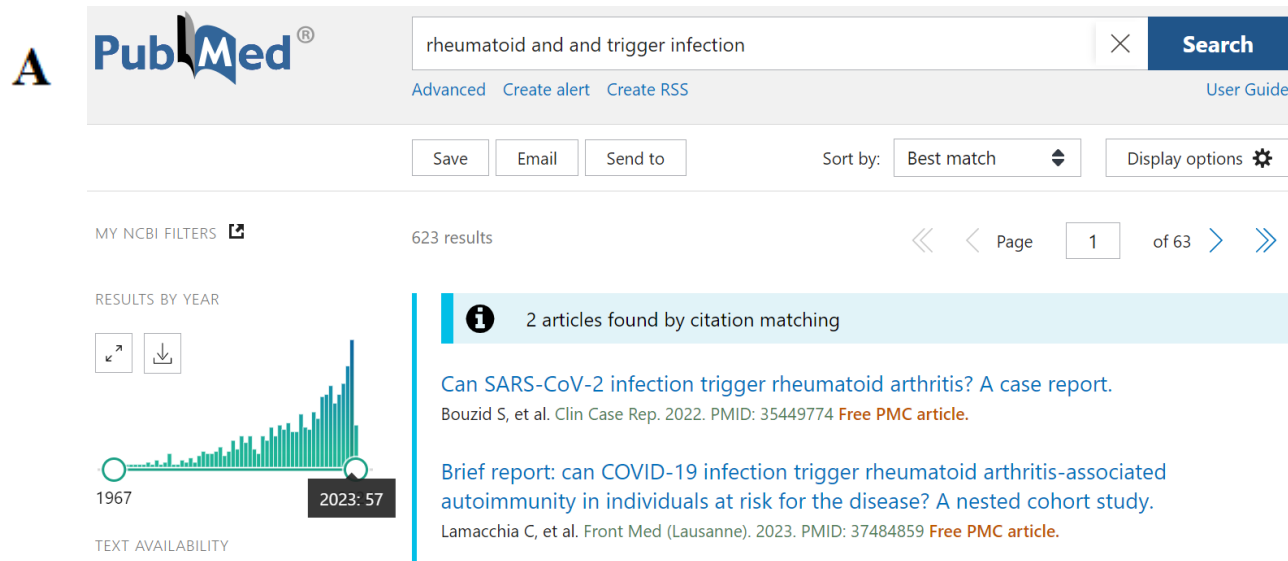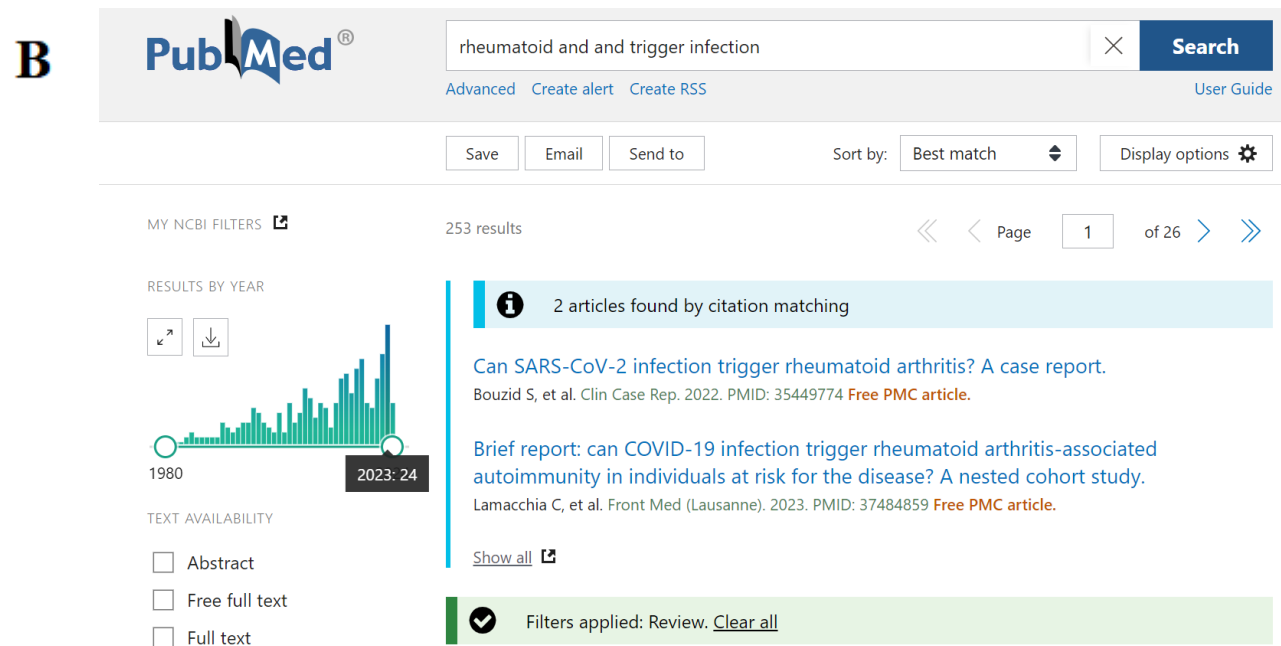

Supplementary Figure S1 Publications on the problem of the trigger role of infections in rheumatoid arthritis development: A: All publications. B: Reviews.

Supplementary Table S1. Probability of reliable correlation of RA indices and annual infection parameters in eRAall cohort with increasing sample size (1- $\beta$  –power of independence criteria, Cramer's V effect size)

| Analized indices                                           | N   | Spearman  | t.N.2.   | p.value  | 1-beta | Probability of reliable correlation with increasing sample size, % |
|------------------------------------------------------------|-----|-----------|----------|----------|--------|--------------------------------------------------------------------|
| <b>All infection burden</b>                                |     |           |          |          |        |                                                                    |
| Serum aCCP level & Annual duration of all episodes         | 115 | -0.172276 | -1.85911 | 0.065613 | 0,46   | 54,44                                                              |
| Serum aCCP leve & One episode duration                     | 115 | -0.216362 | -2.35576 | 0.020208 | 0,65   | 35,37                                                              |
| Serum aCCP level & Annual number of episodes               | 115 | -0.049987 | -0.53204 | 0.595746 | 0,08   | <b>91,72</b>                                                       |
| CRP & Annual duration of all episodes                      | 144 | -0.02322  | -0.27678 | 0.782355 | 0,06   | <b>94,13</b>                                                       |
| CRP & One episode duration                                 | 144 | -0.0705   | -0.8422  | 0.401095 | 0,13   | <b>86,60</b>                                                       |
| CRP & Annual number of episodes                            | 144 | 0.045482  | 0.54254  | 0.588299 | 0,08   | <b>91,58</b>                                                       |
| DASCRP & Annual duration of all episodes                   | 76  | 0.10952   | 0.94783  | 0.3463   | 0,16   | <b>84,34</b>                                                       |
| DASCRP & One episode duration                              | 76  | -0.005559 | -0.04782 | 0.961989 | 0,05   | <b>94,99</b>                                                       |
| DASCRP & Annual number of episodes                         | 76  | 0.177309  | 1.54982  | 0.125451 | 0,34   | <b>66,27</b>                                                       |
| DASESR & Annual duration of all episodes                   | 117 | 0.09137   | 0.98395  | 0.327207 | 0,17   | <b>83,45</b>                                                       |
| DASESR & One episode duration                              | 117 | 0.020329  | 0.21805  | 0.827774 | 0,06   | <b>94,47</b>                                                       |
| DASESR & Annual number of episodes                         | 117 | 0.144897  | 1.57042  | 0.119066 | 0,35   | <b>65,39</b>                                                       |
| ESR & Annual duration of all episodes                      | 154 | 0.045313  | 0.55923  | 0.576826 | 0,09   | <b>91,36</b>                                                       |
| ESR & One episode duration                                 | 154 | 0.075929  | 0.93883  | 0.34931  | 0,16   | <b>84,50</b>                                                       |
| ESR & Annual number of episodes                            | 154 | -0.077631 | -0.95999 | 0.338584 | 0,16   | <b>84,00</b>                                                       |
| HAQ & Annual duration of all episodes                      | 102 | -0.228094 | -2.3427  | 0.021126 | 0,64   | 35,94                                                              |
| HAQ & One episode duration                                 | 102 | -0.200031 | -2.04157 | 0.043827 | 0,53   | 47,36                                                              |
| HAQ & Annual number of episodes                            | 102 | -0.080555 | -0.80818 | 0.420905 | 0,13   | <b>87,30</b>                                                       |
| Morning stiffness, hours & Annual duration of all episodes | 138 | 0.083912  | 0.98203  | 0.327827 | 0,17   | <b>83,49</b>                                                       |
| Morning stiffness, hours & One episode duration            | 138 | 0.11133   | 1.30644  | 0.193607 | 0,26   | <b>74,40</b>                                                       |
| Morning stiffness, hours & Annual number of episodes       | 138 | 0.043843  | 0.51179  | 0.609631 | 0,08   | <b>91,97</b>                                                       |
| Serum RF level & Annual duration of all episodes           | 137 | 0.113963  | 1.33282  | 0.184837 | 0,26   | <b>73,55</b>                                                       |

|                                                                                |     |           |          |          |      |              |
|--------------------------------------------------------------------------------|-----|-----------|----------|----------|------|--------------|
| Serum RF level & One episode duration                                          | 137 | 0.123176  | 1.44216  | 0.151573 | 0,30 | <b>69,90</b> |
| Serum RF level & Annual number of episodes                                     | 137 | 0.009503  | 0.11042  | 0.912242 | 0,05 | <b>94,87</b> |
| Number of swollen joints (DAS28 joint count) & Annual duration of all episodes | 85  | 0.312717  | 2.99942  | 0.00357  | 0,84 | 16,23        |
| Number of swollen joints (DAS28 joint count) & One episode duration            | 85  | 0.276851  | 2.62483  | 0.010318 | 0,73 | 26,52        |
| Number of swollen joints (DAS28 joint count) & Annual number of episodes       | 85  | 0.150027  | 1.38246  | 0.17054  | 0,28 | <b>72,02</b> |
| Number of swollen joints (68 joint count) & Annual duration of all episodes    | 84  | 0.22592   | 2.10008  | 0.038795 | 0,55 | 45,24        |
| Number of swollen joints (68 joint count) & One episode duration               | 84  | 0.189089  | 1.74373  | 0.084954 | 0,41 | <b>59,04</b> |
| Number of swollen joints (68 joint count) & Annual number of episodes          | 84  | 0.13868   | 1.26806  | 0.208366 | 0,24 | <b>75,67</b> |
| Number of tender joints (28 joint count) & Annual duration of all episodes     | 85  | 0.045979  | 0.41933  | 0.676058 | 0,07 | <b>92,99</b> |
| Number of tender joints (28 joint count) & One episode duration                | 85  | 0.029786  | 0.27148  | 0.786696 | 0,06 | <b>94,17</b> |
| Number of tender joints (28 joint count) & Annual number of episodes           | 85  | 0.036138  | 0.32945  | 0.742649 | 0,06 | <b>93,77</b> |
| Number of tender joints (68 joint count) & Annual duration of all episodes     | 85  | -0.156555 | -1.44409 | 0.152479 | 0,30 | <b>69,94</b> |
| Number of tender joints (68 joint count) & One episode duration                | 85  | -0.122672 | -1.1261  | 0.263368 | 0,20 | <b>79,81</b> |
| Number of tender joints (68 joint count) & Annual number of episodes           | 85  | -0.058287 | -0.53193 | 0.596197 | 0,08 | <b>91,73</b> |
| VAS & Annual duration of all episodes                                          | 127 | -0.044517 | -0.49821 | 0.619209 | 0,08 | <b>92,13</b> |
| VAS & One episode duration                                                     | 127 | -0.070282 | -0.78772 | 0.432351 | 0,12 | <b>87,68</b> |
| VAS & Annual number of episodes                                                | 127 | 0.020007  | 0.22373  | 0.823334 | 0,06 | <b>94,44</b> |
| <b>Acute otitis</b>                                                            |     |           |          |          |      |              |
| Serum aCCP level & Annual duration of all episodes                             | 17  | -0.007521 | -0.02913 | 0.977146 | 0,05 | <b>95,00</b> |
| Serum aCCP level & One episode duration                                        | 17  | 0.166389  | 0.65353  | 0.523305 | 0,10 | <b>90,20</b> |
| Serum aCCP level & Annual number of episodes                                   | 17  | -0.14859  | -0.58195 | 0.569245 | 0,09 | <b>91,22</b> |
| CRP & Annual duration of all episodes                                          | 24  | 0.145966  | 0.69205  | 0.496144 | 0,10 | <b>89,52</b> |
| CRP & One episode duration                                                     | 24  | -0.052237 | -0.24535 | 0.808463 | 0,06 | <b>94,38</b> |
| CRP & Annual number of episodes                                                | 24  | 0.114894  | 0.5425   | 0.592931 | 0,08 | <b>91,68</b> |
| DASCRP & Annual duration of all episodes                                       | 11  | 0.344279  | 1.10009  | 0.299846 | 0,18 | <b>81,63</b> |
| DASCRP & One episode duration                                                  | 11  | -0.140921 | -0.42702 | 0.679395 | 0,07 | <b>93,08</b> |
| DASCRP & Annual number of episodes                                             | 11  | 0.205509  | 0.62997  | 0.544372 | 0,09 | <b>90,68</b> |

|                                                                                |    |           |          |          |      |              |
|--------------------------------------------------------------------------------|----|-----------|----------|----------|------|--------------|
| DASESR & Annual duration of all episodes                                       | 20 | 0.3116    | 1.39128  | 0.1811   | 0,27 | <b>72,65</b> |
| DASESR & One episode duration                                                  | 20 | -0.28193  | -1.2467  | 0.228487 | 0,23 | <b>76,99</b> |
| DASESR & Annual number of episodes                                             | 20 | 0.401632  | 1.86064  | 0.079212 | 0,43 | <b>56,66</b> |
| ESR & Annual duration of all episodes                                          | 25 | -0.307277 | -1.54857 | 0.135137 | 0,33 | <b>67,19</b> |
| ESR & One episode duration                                                     | 25 | 0.189178  | 0.92395  | 0.365105 | 0,15 | <b>85,08</b> |
| ESR & Annual number of episodes                                                | 25 | -0.348425 | -1.7827  | 0.087841 | 0,41 | <b>58,91</b> |
| HAQ & Annual duration of all episodes                                          | 17 | 0.495946  | 2.21199  | 0.042901 | 0,55 | 44,99        |
| HAQ & One episode duration                                                     | 17 | 0.043511  | 0.16868  | 0.868305 | 0,05 | <b>94,76</b> |
| HAQ & Annual number of episodes                                                | 17 | 0.374749  | 1.56548  | 0.13832  | 0,33 | <b>67,32</b> |
| Morning stiffness, hours & Annual duration of all episodes                     | 23 | 0.196211  | 0.91697  | 0.369567 | 0,15 | <b>85,26</b> |
| Morning stiffness, hours & One episode duration                                | 23 | 0.224386  | 1.05517  | 0.303335 | 0,18 | <b>82,04</b> |
| Morning stiffness, hours & Annual number of episodes                           | 23 | 0.02601   | 0.11923  | 0.906225 | 0,05 | <b>94,90</b> |
| Serum RF level & Annual duration of all episodes                               | 22 | 0.187731  | 0.85475  | 0.40281  | 0,13 | <b>86,58</b> |
| Serum RF level & One episode duration                                          | 22 | 0.075884  | 0.34035  | 0.737145 | 0,06 | <b>93,75</b> |
| Serum RF level & Annual number of episodes                                     | 22 | 0.066282  | 0.29707  | 0.769474 | 0,06 | <b>94,07</b> |
| Number of swollen joints (DAS28 joint count) & Annual duration of all episodes | 16 | 0.046003  | 0.17231  | 0.865659 | 0,05 | <b>94,76</b> |
| Number of swollen joints (DAS28 joint count) & One episode duration            | 16 | 0.076456  | 0.28691  | 0.778383 | 0,06 | <b>94,16</b> |
| Number of swollen joints (DAS28 joint count) & Annual number of episodes       | 16 | -0.061645 | -0.23109 | 0.820586 | 0,06 | <b>94,49</b> |
| Number of swollen joints (68 joint count) & Annual duration of all episodes    | 16 | 0.121077  | 0.45639  | 0.655111 | 0,07 | <b>92,73</b> |
| Number of swollen joints (68 joint count) & One episode duration               | 16 | 0.189425  | 0.72183  | 0.48228  | 0,11 | <b>89,13</b> |
| Number of swollen joints (68 joint count) & Annual number of episodes          | 16 | -0.07458  | -0.27983 | 0.7837   | 0,06 | <b>94,21</b> |
| Number of tender joints (28 joint count) & Annual duration of all episodes     | 16 | 0.07199   | 0.27006  | 0.791053 | 0,06 | <b>94,27</b> |
| Number of tender joints (28 joint count) & One episode duration                | 16 | 0.326093  | 1.29068  | 0.217723 | 0,24 | <b>75,99</b> |
| Number of tender joints (28 joint count) & Annual number of episodes           | 16 | -0.165037 | -0.6261  | 0.541324 | 0,09 | <b>90,62</b> |
| Number of tender joints (68 joint count) & Annual duration of all episodes     | 16 | 0.130696  | 0.49325  | 0.629482 | 0,08 | <b>92,33</b> |
| Number of tender joints (68 joint count) & One episode duration                | 16 | 0.438383  | 1.82499  | 0.08941  | 0,41 | <b>58,68</b> |
| Number of tender joints (68 joint count) & Annual number of episodes           | 16 | -0.107029 | -0.40278 | 0.693193 | 0,07 | <b>93,25</b> |

|                                                            |    |           |          |          |      |              |
|------------------------------------------------------------|----|-----------|----------|----------|------|--------------|
| VAS & Annual duration of all episodes                      | 22 | 0.221433  | 1.01549  | 0.322001 | 0,17 | <b>83,03</b> |
| VAS & One episode duration                                 | 22 | -0.160669 | -0.72799 | 0.475056 | 0,11 | <b>88,94</b> |
| VAS & Annual number of episodes                            | 22 | 0.267896  | 1.24352  | 0.228056 | 0,23 | <b>77,00</b> |
| <b>Chronic otitis exacerbations</b>                        |    |           |          |          |      |              |
| Serum aCCP level & Annual duration of all episodes         | 18 | 0.002587  | 0.01035  | 0.991873 | 0,05 | <b>95,08</b> |
| Serum aCCP level & One episode duration                    | 18 | -0.103673 | -0.41694 | 0.682263 | 0,07 | <b>93,11</b> |
| Serum aCCP level & Annual number of episodes               | 18 | 0.294843  | 1.23424  | 0.234936 | 0,23 | <b>77,46</b> |
| CRP & Annual duration of all episodes                      | 23 | -0.306184 | -1.4739  | 0.155342 | 0,30 | <b>69,81</b> |
| CRP & One episode duration                                 | 23 | -0.291278 | -1.3953  | 0.177506 | 0,28 | <b>72,35</b> |
| CRP & Annual number of episodes                            | 23 | -0.127944 | -0.59117 | 0.560716 | 0,09 | <b>91,05</b> |
| DASCRP & Annual duration of all episodes                   | 13 | -0.536452 | -2.10824 | 0.058756 | 0,50 | 50,13        |
| DASCRP & One episode duration                              | 13 | -0.226934 | -0.77282 | 0.455915 | 0,12 | <b>88,34</b> |
| DASCRP & Annual number of episodes                         | 13 | -0.473584 | -1.78337 | 0.102107 | 0,39 | <b>60,97</b> |
| DASESR & Annual duration of all episodes                   | 14 | -0.468647 | -1.83775 | 0.090972 | 0,41 | <b>58,80</b> |
| DASESR & One episode duration                              | 14 | -0.198911 | -0.7031  | 0.495411 | 0,11 | <b>89,49</b> |
| DASESR & Annual number of episodes                         | 14 | -0.498961 | -1.99447 | 0.069325 | 0,47 | 53,48        |
| ESR & Annual duration of all episodes                      | 24 | -0.092593 | -0.43617 | 0.666963 | 0,07 | <b>92,89</b> |
| ESR & One episode duration                                 | 24 | 0.111458  | 0.52606  | 0.60411  | 0,08 | <b>91,89</b> |
| ESR & Annual number of episodes                            | 24 | -0.193763 | -0.92638 | 0.364298 | 0,15 | <b>85,04</b> |
| HAQ & Annual duration of all episodes                      | 15 | -0.658879 | -3.15803 | 0.007554 | 0,80 | 19,68        |
| HAQ & One episode duration                                 | 15 | -0.401471 | -1.58049 | 0.138011 | 0,33 | <b>67,15</b> |
| HAQ & Annual number of episodes                            | 15 | -0.542317 | -2.32732 | 0.036746 | 0,58 | 41,94        |
| Morning stiffness, hours & Annual duration of all episodes | 21 | 0.03764   | 0.16419  | 0.871318 | 0,05 | <b>94,77</b> |
| Morning stiffness, hours & One episode duration            | 21 | 0.016656  | 0.07261  | 0.942874 | 0,05 | <b>95,01</b> |
| Morning stiffness, hours & Annual number of episodes       | 21 | 0.050319  | 0.21961  | 0.828515 | 0,05 | <b>94,52</b> |
| Serum RF level & Annual duration of all episodes           | 21 | 0.402373  | 1.91584  | 0.070558 | 0,45 | 54,53        |
| Serum RF level & One episode duration                      | 21 | 0.486986  | 2.43039  | 0.02516  | 0,63 | 36,58        |
| Serum RF level & Annual number of episodes                 | 21 | 0.067794  | 0.29619  | 0.770298 | 0,06 | <b>94,08</b> |

|                                                                                |    |           |          |          |      |              |
|--------------------------------------------------------------------------------|----|-----------|----------|----------|------|--------------|
| Number of swollen joints (DAS28 joint count) & Annual duration of all episodes | 14 | 0.211863  | 0.75096  | 0.467147 | 0,11 | <b>88,69</b> |
| Number of swollen joints (DAS28 joint count) & One episode duration            | 14 | 0.185386  | 0.65352  | 0.525744 | 0,10 | <b>90,26</b> |
| Number of swollen joints (DAS28 joint count) & Annual number of episodes       | 14 | -0.010299 | -0.03568 | 0.972125 | 0,05 | <b>95,08</b> |
| Number of swollen joints (68 joint count) & Annual duration of all episodes    | 13 | 0.119452  | 0.39903  | 0.697506 | 0,07 | <b>93,32</b> |
| Number of swollen joints (68 joint count) & One episode duration               | 13 | -0.173913 | -0.58573 | 0.569879 | 0,09 | <b>91,24</b> |
| Number of swollen joints (68 joint count) & Annual number of episodes          | 13 | -0.005634 | -0.01869 | 0.985427 | 0,05 | <b>95,10</b> |
| Number of tender joints (28 joint count) & Annual duration of all episodes     | 14 | -0.2442   | -0.87234 | 0.400139 | 0,14 | <b>86,43</b> |
| Number of tender joints (28 joint count) & One episode duration                | 14 | -0.136164 | -0.47612 | 0.64254  | 0,07 | <b>92,54</b> |
| Number of tender joints (28 joint count) & Annual number of episodes           | 14 | -0.209826 | -0.74341 | 0.471539 | 0,11 | <b>88,82</b> |
| Number of tender joints (68 joint count) & Annual duration of all episodes     | 14 | -0.588106 | -2.51891 | 0.026963 | 0,63 | 36,52        |
| Number of tender joints (68 joint count) & One episode duration                | 14 | -0.46276  | -1.80832 | 0.095666 | 0,40 | <b>59,80</b> |
| Number of tender joints (68 joint count) & Annual number of episodes           | 14 | -0.309248 | -1.12649 | 0.281984 | 0,19 | <b>80,64</b> |
| VAS & Annual duration of all episodes                                          | 16 | -0.572587 | -2.61321 | 0.020445 | 0,67 | 32,65        |
| VAS & One episode duration                                                     | 16 | -0.454167 | -1.9074  | 0.077196 | 0,44 | <b>55,82</b> |
| VAS & Annual number of episodes                                                | 16 | -0.341327 | -1.35873 | 0.195723 | 0,26 | <b>73,99</b> |
| <b>Chronic bronchitis exacerbations</b>                                        |    |           |          |          |      |              |
| Serum aCCP level & Annual duration of all episodes                             | 6  | -0.115954 | -0.23348 | 0.826848 | 0,06 | <b>94,42</b> |
| Serum aCCP level & One episode duration                                        | 6  | 0.091077  | 0.18291  | 0.863763 | 0,05 | <b>94,64</b> |
| Serum aCCP level & Annual number of episodes                                   | 6  | -0.654654 | -1.73205 | 0.158302 | 0,31 | <b>68,72</b> |
| CRP & Annual duration of all episodes                                          | 10 | 0.400652  | 1.23682  | 0.251227 | 0,22 | <b>78,39</b> |
| CRP & One episode duration                                                     | 10 | 0.191824  | 0.55283  | 0.595488 | 0,08 | <b>91,73</b> |
| CRP & Annual number of episodes                                                | 10 | 0.195508  | 0.56386  | 0.588302 | 0,08 | <b>91,60</b> |
| DASCRP & Annual duration of all episodes                                       | 5  | 0.615587  | 1.35296  | 0.268998 | 0,21 | <b>79,03</b> |
| DASCRP & One episode duration                                                  | 5  | 0.615587  | 1.35296  | 0.268998 | 0,21 | <b>79,03</b> |
| DASCRP & Annual number of episodes                                             | 5  | NA        | NA       | NA       | NA   | NA           |
| DASESR & Annual duration of all episodes                                       | 6  | -0.086966 | -0.17459 | 0.86988  | 0,05 | <b>94,67</b> |
| DASESR & One episode duration                                                  | 6  | -0.086966 | -0.17459 | 0.86988  | 0,05 | <b>94,67</b> |

|                                                                                |    |           |          |          |      |              |
|--------------------------------------------------------------------------------|----|-----------|----------|----------|------|--------------|
| DASESR & Annual number of episodes                                             | 6  | NA        | NA       | NA       | NA   | NA           |
| ESR & Annual duration of all episodes                                          | 11 | 0.139588  | 0.42291  | 0.682289 | 0,07 | <b>93,12</b> |
| ESR & One episode duration                                                     | 11 | -0.057741 | -0.17351 | 0.866089 | 0,05 | <b>94,78</b> |
| ESR & Annual number of episodes                                                | 11 | 0.129875  | 0.39295  | 0.703499 | 0,07 | <b>93,40</b> |
| HAQ & Annual duration of all episodes                                          | 5  | 0.666886  | 1.55011  | 0.218894 | 0,25 | <b>75,07</b> |
| HAQ & One episode duration                                                     | 5  | 0.631579  | 1.41095  | 0.25308  | 0,22 | <b>77,88</b> |
| HAQ & Annual number of episodes                                                | 5  | 0.725476  | 1.82574  | 0.16537  | 0,31 | <b>69,36</b> |
| Morning stiffness, hours & Annual duration of all episodes                     | 12 | 0.12524   | 0.39919  | 0.698148 | 0,07 | <b>93,33</b> |
| Morning stiffness, hours & One episode duration                                | 12 | 0.045128  | 0.14285  | 0.889245 | 0,05 | <b>94,88</b> |
| Morning stiffness, hours & Annual number of episodes                           | 12 | 0.137851  | 0.44013  | 0.669207 | 0,07 | <b>92,94</b> |
| Serum RF level & Annual duration of all episodes                               | 11 | NA        | NA       | NA       | NA   | NA           |
| Serum RF level & One episode duration                                          | 11 | NA        | NA       | NA       | NA   | NA           |
| Serum RF level & Annual number of episodes                                     | 11 | NA        | NA       | NA       | NA   | NA           |
| Number of swollen joints (DAS28 joint count) & Annual duration of all episodes | 6  | 0.602941  | 1.51154  | 0.205184 | 0,26 | <b>74,04</b> |
| Number of swollen joints (DAS28 joint count) & One episode duration            | 6  | 0.582154  | 1.43198  | 0.225416 | 0,24 | <b>75,90</b> |
| Number of swollen joints (DAS28 joint count) & Annual number of episodes       | 6  | 0.664211  | 1.77705  | 0.1502   | 0,32 | <b>67,62</b> |
| Number of swollen joints (68 joint count) & Annual duration of all episodes    | 5  | 0.666886  | 1.55011  | 0.218894 | 0,25 | <b>75,07</b> |
| Number of swollen joints (68 joint count) & One episode duration               | 5  | 0.631579  | 1.41095  | 0.25308  | 0,22 | <b>77,88</b> |
| Number of swollen joints (68 joint count) & Annual number of episodes          | 5  | 0.725476  | 1.82574  | 0.16537  | 0,31 | <b>69,36</b> |
| Number of tender joints (28 joint count) & Annual duration of all episodes     | 6  | 0.764706  | 2.37346  | 0.076532 | 0,47 | 53,25        |
| Number of tender joints (28 joint count) & One episode duration                | 6  | 0.776206  | 2.46227  | 0.069521 | 0,49 | 51,22        |
| Number of tender joints (28 joint count) & Annual number of episodes           | 6  | 0.531369  | январ.45 | 0.277963 | 0,20 | <b>79,90</b> |
| Number of tender joints (68 joint count) & Annual duration of all episodes     | 6  | 0.617647  | 1.57071  | 0.191342 | 0,27 | <b>72,63</b> |
| Number of tender joints (68 joint count) & One episode duration                | 6  | 0.716498  | 2.05421  | 0.109167 | 0,39 | <b>60,84</b> |
| Number of tender joints (68 joint count) & Annual number of episodes           | 6  | -0.132842 | -0.26806 | 0.801909 | 0,06 | <b>94,24</b> |
| VAS & Annual duration of all episodes                                          | 7  | 0.666694  | 2.00015  | 0.10192  | 0,40 | <b>59,70</b> |
| VAS & One episode duration                                                     | 7  | 0.691023  | 2.13767  | 0.08557  | 0,44 | <b>56,02</b> |

|                                                                                |    |           |          |          |      |              |
|--------------------------------------------------------------------------------|----|-----------|----------|----------|------|--------------|
| VAS & Annual number of episodes                                                | 7  | 0.408248  | 1        | 0.363217 | 0,15 | <b>84,70</b> |
| <b>HSV exacerbation</b>                                                        |    |           |          |          |      |              |
| Serum aCCP level & Annual duration of all episodes                             | 54 | -0.27296  | -2.04604 | 0.045825 | 0,52 | 47,77        |
| Serum aCCP level & One episode duration                                        | 54 | -0.169014 | -1.23657 | 0.221803 | 0,23 | <b>76,73</b> |
| Serum aCCP level & Annual number of episodes                                   | 54 | -0.255541 | -1.90601 | 0.062183 | 0,47 | 53,14        |
| CRP & Annual duration of all episodes                                          | 63 | 0.065933  | 0.51608  | 0.607667 | 0,08 | <b>91,94</b> |
| CRP & One episode duration                                                     | 63 | 0.006166  | 0.04816  | 0.961748 | 0,05 | <b>95,00</b> |
| CRP & Annual number of episodes                                                | 63 | 0.05869   | 0.45917  | 0.647742 | 0,07 | <b>92,59</b> |
| DASCRP & Annual duration of all episodes                                       | 30 | 0.183048  | 0.98525  | 0.332941 | 0,16 | <b>83,63</b> |
| DASCRP & One episode duration                                                  | 30 | 0.208412  | 1.12757  | 0.269071 | 0,20 | <b>80,04</b> |
| DASCRP & Annual number of episodes                                             | 30 | 0.105318  | 0.56041  | 0.579659 | 0,09 | <b>91,43</b> |
| DASESR & Annual duration of all episodes                                       | 54 | -0.042857 | -0.30933 | 0.758304 | 0,06 | <b>93,93</b> |
| DASESR & One episode duration                                                  | 54 | 0.122924  | 0.89319  | 0.37587  | 0,14 | <b>85,59</b> |
| DASESR & Annual number of episodes                                             | 54 | -0.127209 | -0.92483 | 0.359327 | 0,15 | <b>84,90</b> |
| ESR & Annual duration of all episodes                                          | 69 | -0.336034 | -2.92038 | 0.004759 | 0,82 | 18,45        |
| ESR & One episode duration                                                     | 69 | -0.19627  | -1.6384  | 0.106026 | 0,37 | <b>63,09</b> |
| ESR & Annual number of episodes                                                | 69 | -0.366752 | -3.22685 | 0.001938 | 0,88 | 11,80        |
| HAQ & Annual duration of all episodes                                          | 51 | -0.16386  | -1.16274 | 0.250568 | 0,21 | <b>78,89</b> |
| HAQ & One episode duration                                                     | 51 | -0.109393 | -0.77037 | 0.444777 | 0,12 | <b>88,06</b> |
| HAQ & Annual number of episodes                                                | 51 | -0.128631 | -0.90796 | 0.368344 | 0,15 | <b>85,28</b> |
| Morning stiffness, hours & Annual duration of all episodes                     | 66 | -0.056493 | -0.45267 | 0.652317 | 0,07 | <b>92,66</b> |
| Morning stiffness, hours & One episode duration                                | 66 | -0.138074 | -1.11527 | 0.268905 | 0,20 | <b>80,15</b> |
| Morning stiffness, hours & Annual number of episodes                           | 66 | -0.035067 | -0.28071 | 0.779839 | 0,06 | <b>94,12</b> |
| Serum RF level & Annual duration of all episodes                               | 64 | 0.056138  | 0.44273  | 0.659504 | 0,07 | <b>92,76</b> |
| Serum RF level & One episode duration                                          | 64 | 0.064204  | 0.50659  | 0.614242 | 0,08 | <b>92,05</b> |
| Serum RF level & Annual number of episodes                                     | 64 | 0.005408  | 0.04258  | 0.966172 | 0,05 | <b>95,00</b> |
| Number of swollen joints (DAS28 joint count) & Annual duration of all episodes | 37 | 0.12129   | 0.7229   | 0.474544 | 0,11 | <b>88,94</b> |



|                                                                             |    |           |          |          |      |              |
|-----------------------------------------------------------------------------|----|-----------|----------|----------|------|--------------|
| Number of swollen joints (DAS28 joint count) & One episode duration         | 37 | 0.098673  | 0.58662  | 0.561224 | 0,09 | <b>91,05</b> |
| Number of swollen joints (DAS28 joint count) & Annual number of episodes    | 37 | 0.13588   | 0.8114   | 0.422619 | 0,13 | <b>87,32</b> |
| Number of swollen joints (68 joint count) & Annual duration of all episodes | 37 | 0.051864  | 0.30724  | 0.760479 | 0,06 | <b>93,96</b> |
| Number of swollen joints (68 joint count) & One episode duration            | 37 | 0.066779  | 0.39595  | 0.694542 | 0,07 | <b>93,24</b> |
| Number of swollen joints (68 joint count) & Annual number of episodes       | 37 | 0.035139  | 0.20802  | 0.836423 | 0,05 | <b>94,55</b> |
| Number of tender joints (28 joint count) & Annual duration of all episodes  | 37 | -0.056886 | -0.33709 | 0.738064 | 0,06 | <b>93,74</b> |
| Number of tender joints (28 joint count) & One episode duration             | 37 | -0.095881 | -0.56987 | 0.572408 | 0,09 | <b>91,28</b> |
| Number of tender joints (28 joint count) & Annual number of episodes        | 37 | 0.029588  | 0.17512  | 0.861991 | 0,05 | <b>94,69</b> |
| Number of tender joints (68 joint count) & Annual duration of all episodes  | 37 | -0.307679 | -1.91306 | 0.06395  | 0,47 | 53,36        |
| Number of tender joints (68 joint count) & One episode duration             | 37 | -0.335345 | -2.10587 | 0.04246  | 0,54 | 46,11        |
| Number of tender joints (68 joint count) & Annual number of episodes        | 37 | -0.190593 | -1.14862 | 0.258504 | 0,21 | <b>79,38</b> |
| VAS & Annual duration of all episodes                                       | 62 | -0.056468 | -0.4381  | 0.662889 | 0,07 | <b>92,81</b> |
| VAS & One episode duration                                                  | 62 | -0.00262  | -0.02029 | 0.983879 | 0,05 | <b>95,02</b> |
| VAS & Annual number of episodes                                             | 62 | -0.053573 | -0.41557 | 0.679204 | 0,07 | <b>93,03</b> |
| <b>Skin and soft tissue infections</b>                                      |    |           |          |          |      |              |
| Serum aCCP level & Annual duration of all episodes                          | 13 | 0.225968  | 0.76935  | 0.457887 | 0,12 | <b>88,40</b> |
| Serum aCCP level & One episode duration                                     | 13 | -0.474766 | -1.78911 | 0.101135 | 0,39 | <b>60,78</b> |
| Serum aCCP level & Annual number of episodes                                | 13 | 0.391216  | 1.40989  | 0.186216 | 0,27 | <b>72,88</b> |
| CRP & Annual duration of all episodes                                       | 15 | 0.173759  | 0.63617  | 0.535703 | 0,10 | <b>90,49</b> |
| CRP & One episode duration                                                  | 15 | -0.020264 | -0.07308 | 0.942858 | 0,05 | <b>95,03</b> |
| CRP & Annual number of episodes                                             | 15 | 0.183004  | 0.67116  | 0.513865 | 0,10 | <b>89,97</b> |
| DASCRP & Annual duration of all episodes                                    | 7  | 0.234244  | 0.53877  | 0.613155 | 0,08 | <b>92,00</b> |
| DASCRP & One episode duration                                               | 7  | -0.181848 | -0.41352 | 0.696364 | 0,07 | <b>93,26</b> |
| DASCRP & Annual number of episodes                                          | 7  | 0.316228  | 0.74536  | 0.48959  | 0,11 | <b>89,22</b> |
| DASESR & Annual duration of all episodes                                    | 12 | -0.003559 | -0.01126 | 0.991241 | 0,05 | <b>95,11</b> |
| DASESR & One episode duration                                               | 12 | -0.218046 | -0.70652 | 0.495995 | 0,11 | <b>89,49</b> |
| DASESR & Annual number of episodes                                          | 12 | 0.070489  | 0.22346  | 0.827675 | 0,05 | <b>94,55</b> |

|                                                                                |    |           |          |          |      |              |
|--------------------------------------------------------------------------------|----|-----------|----------|----------|------|--------------|
| ESR & Annual duration of all episodes                                          | 15 | -0.289407 | -1.09012 | 0.295454 | 0,19 | <b>81,48</b> |
| ESR & One episode duration                                                     | 15 | 0.341414  | 1.30968  | 0.212978 | 0,24 | <b>75,55</b> |
| ESR & Annual number of episodes                                                | 15 | -0.388946 | -1.52222 | 0.151901 | 0,31 | <b>69,04</b> |
| HAQ & Annual duration of all episodes                                          | 9  | 0.221295  | 0.60038  | 0.567177 | 0,09 | <b>91,16</b> |
| HAQ & One episode duration                                                     | 9  | -0.17324  | -0.46539 | 0.655787 | 0,07 | <b>92,74</b> |
| HAQ & Annual number of episodes                                                | 9  | 0.230046  | 0.62542  | 0.551533 | 0,09 | <b>90,83</b> |
| Morning stiffness, hours & Annual duration of all episodes                     | 12 | 0.135474  | 0.43239  | 0.674631 | 0,07 | <b>93,02</b> |
| Morning stiffness, hours & One episode duration                                | 12 | 0.248659  | 0.81183  | 0.435789 | 0,12 | <b>87,68</b> |
| Morning stiffness, hours & Annual number of episodes                           | 12 | -0.02956  | -0.09352 | 0.92734  | 0,05 | <b>95,01</b> |
| Serum RF level & Annual duration of all episodes                               | 15 | NA        | NA       | NA       | NA   | NA           |
| Serum RF level & One episode duration                                          | 15 | NA        | NA       | NA       | NA   | NA           |
| Serum RF level & Annual number of episodes                                     | 15 | NA        | NA       | NA       | NA   | NA           |
| Number of swollen joints (DAS28 joint count) & Annual duration of all episodes | 7  | 0.165145  | 0.37442  | 0.723449 | 0,06 | <b>93,59</b> |
| Number of swollen joints (DAS28 joint count) & One episode duration            | 7  | 0.101852  | 0.22894  | 0.827986 | 0,05 | <b>94,52</b> |
| Number of swollen joints (DAS28 joint count) & Annual number of episodes       | 7  | 0.080508  | 0.18061  | 0.863768 | 0,05 | <b>94,73</b> |
| Number of swollen joints (68 joint count) & Annual duration of all episodes    | 7  | 0.072727  | 0.16305  | 0.876861 | 0,05 | <b>94,79</b> |
| Number of swollen joints (68 joint count) & One episode duration               | 7  | 0.238542  | 0.54925  | 0.606461 | 0,08 | <b>91,88</b> |
| Number of swollen joints (68 joint count) & Annual number of episodes          | 7  | -0.079772 | -0.17895 | 0.865005 | 0,05 | <b>94,74</b> |
| Number of tender joints (28 joint count) & Annual duration of all episodes     | 7  | 0.272727  | 0.63387  | 0.554029 | 0,09 | <b>90,83</b> |
| Number of tender joints (28 joint count) & One episode duration                | 7  | -0.027524 | -0.06157 | 0.953291 | 0,05 | <b>95,04</b> |
| Number of tender joints (28 joint count) & Annual number of episodes           | 7  | 0.239317  | 0.55115  | 0.605256 | 0,08 | <b>91,86</b> |
| Number of tender joints (68 joint count) & Annual duration of all episodes     | 7  | -0.082572 | -0.18527 | 0.860298 | 0,05 | <b>94,71</b> |
| Number of tender joints (68 joint count) & One episode duration                | 7  | -0.462963 | -1.16792 | 0.295496 | 0,19 | <b>81,14</b> |
| Number of tender joints (68 joint count) & Annual number of episodes           | 7  | 0.161015  | 0.3648   | 0.730182 | 0,06 | <b>93,66</b> |
| VAS & Annual duration of all episodes                                          | 13 | 0.064161  | 0.21324  | 0.835042 | 0,05 | <b>94,60</b> |
| VAS & One episode duration                                                     | 13 | -0.070362 | -0.23394 | 0.819325 | 0,06 | <b>94,49</b> |
| VAS & Annual number of episodes                                                | 13 | 0.078698  | 0.26182  | 0.798295 | 0,06 | <b>94,34</b> |

| URLab                                                                          |    |           |          |          |      |              |
|--------------------------------------------------------------------------------|----|-----------|----------|----------|------|--------------|
| Serum aCCP level & Annual duration of all episodes                             | 27 | 0.10836   | 0.54501  | 0.590578 | 0,08 | <b>91,64</b> |
| Serum aCCP levelSerum aCCP level & One episode duration                        | 27 | -0.181319 | -0.92188 | 0.365405 | 0,15 | <b>85,10</b> |
| Serum aCCP level & Annual number of episodes                                   | 27 | 0.262071  | 1.35781  | 0.186653 | 0,27 | <b>73,37</b> |
| CRP & Annual duration of all episodes                                          | 32 | -0.04232  | -0.232   | 0.81811  | 0,06 | <b>94,43</b> |
| CRP & One episode duration                                                     | 32 | -0.237214 | -1.33745 | 0.191129 | 0,26 | <b>73,88</b> |
| CRP & Annual number of episodes                                                | 32 | 0.091575  | 0.50369  | 0.618157 | 0,08 | <b>92,13</b> |
| DASCRP & Annual duration of all episodes                                       | 18 | -0.141374 | -0.57123 | 0.575778 | 0,09 | <b>91,35</b> |
| DASCRP & One episode duration                                                  | 18 | -0.276295 | -1.14994 | 0.267066 | 0,20 | <b>79,77</b> |
| DASCRP & Annual number of episodes                                             | 18 | -0.049061 | -0.19648 | 0.846707 | 0,05 | <b>94,65</b> |
| DASESR &Annual duration of all episodes                                        | 30 | -0.051208 | -0.27132 | 0.788133 | 0,06 | <b>94,21</b> |
| DASESR & One episode duration                                                  | 30 | -0.317523 | -1.77187 | 0.0873   | 0,41 | <b>58,97</b> |
| DASESR & Annual number of episodes                                             | 30 | 0.231489  | 1.25913  | 0.218381 | 0,24 | <b>76,31</b> |
| ESR & Annual duration of all episodes                                          | 34 | 0.256297  | 1.49994  | 0.143433 | 0,31 | <b>68,51</b> |
| ESR & One episode duration                                                     | 34 | 0.184099  | 1.05953  | 0.29729  | 0,18 | <b>81,77</b> |
| ESR & Annual number of episodes                                                | 34 | 0.036313  | 0.20555  | 0.838443 | 0,05 | <b>94,56</b> |
| HAQ & Annual duration of all episodes                                          | 24 | -0.482188 | -2.58161 | 0.017024 | 0,69 | 31,12        |
| HAQ & One episode duration                                                     | 24 | -0.473543 | -2.52178 | 0.019419 | 0,67 | 32,99        |
| HAQ & Annual number of episodes                                                | 24 | -0.064758 | -0.30438 | 0.763698 | 0,06 | <b>94,01</b> |
| Morning stiffness, hours & Annual duration of all episodes                     | 30 | -0.076092 | -0.40381 | 0.689419 | 0,07 | <b>93,18</b> |
| Morning stiffness, hours & One episode duration                                | 30 | 0.049588  | 0.26272  | 0.794692 | 0,06 | <b>94,26</b> |
| Morning stiffness, hours & Annual number of episodes                           | 30 | -0.181241 | -0.97519 | 0.337819 | 0,16 | <b>83,87</b> |
| Serum RF level & Annual duration of all episodes                               | 34 | 0.331974  | 1.99083  | 0.055096 | 0,49 | 50,58        |
| Serum RF level & One episode duration                                          | 34 | 0.163915  | 0.93996  | 0.354281 | 0,15 | <b>84,64</b> |
| Serum RF level & Annual number of episodes                                     | 34 | 0.166267  | 0.95382  | 0.347323 | 0,16 | <b>84,33</b> |
| Number of swollen joints (DAS28 joint count) & Annual duration of all episodes | 21 | 0.155021  | 0.68399  | 0.502239 | 0,10 | <b>89,68</b> |
| Number of swollen joints (DAS28 joint count) & One episode duration            | 21 | 0.200067  | 0.89007  | 0.384562 | 0,14 | <b>85,87</b> |

|                                                                             |    |           |          |          |      |              |
|-----------------------------------------------------------------------------|----|-----------|----------|----------|------|--------------|
| Number of swollen joints (DAS28 joint count) & Annual number of episodes    | 21 | -0.045215 | -0.19729 | 0.845695 | 0,05 | <b>94,63</b> |
| Number of swollen joints (68 joint count) & Annual duration of all episodes | 21 | 0.023394  | 0.102    | 0.919826 | 0,05 | <b>94,95</b> |
| Number of swollen joints (68 joint count) & One episode duration            | 21 | 0.127153  | 0.55878  | 0.582836 | 0,09 | <b>91,49</b> |
| Number of swollen joints (68 joint count) & Annual number of episodes       | 21 | -0.179905 | -0.79719 | 0.435188 | 0,12 | <b>87,71</b> |
| Number of tender joints (28 joint count) & Annual duration of all episodes  | 21 | -0.140079 | -0.61667 | 0.544771 | 0,09 | <b>90,70</b> |
| Number of tender joints (28 joint count) & One episode duration             | 21 | 0.065916  | 0.28795  | 0.776503 | 0,06 | <b>94,13</b> |
| Number of tender joints (28 joint count) & Annual number of episodes        | 21 | -0.348595 | -1.62118 | 0.121457 | 0,35 | <b>64,98</b> |
| Number of tender joints (68 joint count) & Annual duration of all episodes  | 21 | -0.456465 | -2.23625 | 0.037527 | 0,57 | 43,12        |
| Number of tender joints (68 joint count) & One episode duration             | 21 | -0.160756 | -0.70995 | 0.486355 | 0,11 | <b>89,26</b> |
| Number of tender joints (68 joint count) & Annual number of episodes        | 21 | -0.415497 | -1.99112 | 0.061045 | 0,48 | 51,82        |
| VAS & Annual duration of all episodes                                       | 31 | -0.261741 | -1.46043 | 0.154922 | 0,30 | <b>69,92</b> |
| VAS & One episode duration                                                  | 31 | -0.219744 | -1.21301 | 0.234915 | 0,22 | <b>77,64</b> |
| VAS & Annual number of episodes                                             | 31 | -0.068761 | -0.37117 | 0.713211 | 0,07 | <b>93,47</b> |
| <b>V-URI</b>                                                                |    |           |          |          |      |              |
| Serum aCCP level & Annual duration of all episodes                          | 73 | -0.133671 | -1.13653 | 0.259556 | 0,20 | <b>79,54</b> |
| Serum aCCP level & One episode duration                                     | 73 | -0.05456  | -0.46042 | 0.646622 | 0,07 | <b>92,57</b> |
| Serum aCCP level & Annual number of episodes                                | 73 | -0.131363 | -1.11656 | 0.267946 | 0,20 | <b>80,09</b> |
| CRP & Annual duration of all episodes                                       | 85 | 0.106836  | 0.97893  | 0.33046  | 0,16 | <b>83,60</b> |
| CRP & One episode duration                                                  | 86 | 0.024317  | 0.22293  | 0.824129 | 0,06 | <b>94,45</b> |
| CRP & Annual number of episodes                                             | 86 | 0.100336  | 0.92426  | 0.357999 | 0,15 | <b>84,86</b> |
| DASCRP & Annual duration of all episodes                                    | 50 | -0.051712 | -0.35875 | 0.721353 | 0,06 | <b>93,55</b> |
| DASCRP & One episode duration                                               | 50 | 0.023045  | 0.1597   | 0.873784 | 0,05 | <b>94,74</b> |
| DASCRP & Annual number of episodes                                          | 50 | -0.006798 | -0.0471  | 0.962628 | 0,05 | <b>95,01</b> |
| DASESR & Annual duration of all episodes                                    | 71 | 0.076762  | 0.63952  | 0.5246   | 0,10 | <b>90,24</b> |
| DASESR & One episode duration                                               | 72 | 0.132633  | 1.11958  | 0.266722 | 0,20 | <b>80,01</b> |
| DASESR & Annual number of episodes                                          | 72 | 0.056202  | 0.47097  | 0.63913  | 0,08 | <b>92,46</b> |
| ESR & Annual duration of all episodes                                       | 91 | -0.010044 | -0.09476 | 0.924718 | 0,05 | <b>94,91</b> |

|                                                                                |    |           |          |          |      |              |
|--------------------------------------------------------------------------------|----|-----------|----------|----------|------|--------------|
| ESR & One episode duration                                                     | 92 | -0.013467 | -0.12777 | 0.898618 | 0,05 | <b>94,83</b> |
| ESR & Annual number of episodes                                                | 92 | -0.009179 | -0.08709 | 0.930796 | 0,05 | <b>94,93</b> |
| HAQ & Annual duration of all episodes                                          | 63 | -0.018096 | -0.14136 | 0.888052 | 0,05 | <b>94,80</b> |
| HAQ & One episode duration                                                     | 63 | 0.088771  | 0.69607  | 0.489029 | 0,11 | <b>89,35</b> |
| HAQ & Annual number of episodes                                                | 63 | -0.040264 | -0.31472 | 0.754045 | 0,06 | <b>93,89</b> |
| Morning stiffness, hours & Annual duration of all episodes                     | 83 | 0.042207  | 0.38021  | 0.704788 | 0,07 | <b>93,35</b> |
| Morning stiffness, hours & One episode duration                                | 84 | -0.051155 | -0.46383 | 0.643995 | 0,07 | <b>92,53</b> |
| Morning stiffness, hours & Annual number of episodes                           | 84 | 0.107311  | 0.97738  | 0.331254 | 0,16 | <b>83,63</b> |
| Serum RF level & Annual duration of all episodes                               | 83 | 0.111939  | 1.01382  | 0.313686 | 0,17 | <b>82,75</b> |
| Serum RF level & One episode duration                                          | 84 | 0.151426  | 1.38722  | 0.169135 | 0,28 | <b>71,86</b> |
| Serum RF level & Annual number of episodes                                     | 84 | 0.034182  | 0.30971  | 0.757566 | 0,06 | <b>93,92</b> |
| Number of swollen joints (DAS28 joint count) & Annual duration of all episodes | 52 | -0.003315 | -0.02344 | 0.98139  | 0,05 | <b>95,02</b> |
| Number of swollen joints (DAS28 joint count) & One episode duration            | 52 | 0.004152  | 0.02936  | 0.976694 | 0,05 | <b>95,02</b> |
| Number of swollen joints (DAS28 joint count) & Annual number of episodes       | 52 | 0.056077  | 0.39715  | 0.692949 | 0,07 | <b>93,21</b> |
| Number of swollen joints (68 joint count) & Annual duration of all episodes    | 51 | 0.055843  | 0.39151  | 0.697119 | 0,07 | <b>93,27</b> |
| Number of swollen joints (68 joint count) & One episode duration               | 51 | 0.048364  | 0.33894  | 0.736101 | 0,06 | <b>93,71</b> |
| Number of swollen joints (68 joint count) & Annual number of episodes          | 51 | 0.107329  | 0.75567  | 0.453467 | 0,12 | <b>88,33</b> |
| Number of tender joints (28 joint count) & Annual duration of all episodes     | 52 | -0.026474 | -0.18727 | 0.852209 | 0,05 | <b>94,63</b> |
| Number of tender joints (28 joint count) & One episode duration                | 52 | 0.071795  | 0.50898  | 0.613003 | 0,08 | <b>92,03</b> |
| Number of tender joints (28 joint count) & Annual number of episodes           | 52 | -0.013356 | -0.09445 | 0.925127 | 0,05 | <b>94,93</b> |
| Number of tender joints (68 joint count) & Annual duration of all episodes     | 52 | -0.138638 | -0.98988 | 0.326999 | 0,17 | <b>83,39</b> |
| Number of tender joints (68 joint count) & One episode duration                | 52 | 0.058933  | 0.41745  | 0.67814  | 0,07 | <b>93,02</b> |
| Number of tender joints (68 joint count) & Annual number of episodes           | 52 | -0.155322 | -1.11178 | 0.271548 | 0,20 | <b>80,29</b> |
| VAS & Annual duration of all episodes                                          | 76 | -0.064099 | -0.55253 | 0.582248 | 0,09 | <b>91,47</b> |
| VAS & One episode duration                                                     | 77 | 0.049499  | 0.4292   | 0.66901  | 0,07 | <b>92,89</b> |
| VAS & Annual number of episodes                                                | 77 | -0.042746 | -0.37053 | 0.712035 | 0,07 | <b>93,44</b> |
